# Supplementary material for: Direct-writing of circuit interconnects on cellulose paper using ultra-long, silver nanowires based conducting ink
Source: Royal Society of Chemistry journal article supplement (doi:10.1039/c5ra10837c), 2015-01-01
Supplement: c5ra10837c1.pdf [file c5ra10837c1.pdf]

## SUPPORTING INFORMATION

### Direct-Writing of Circuit Interconnects on Cellulose Paper using Ultra-Long, Silver Nanowires based Conducting Ink

Keerthi G. Nair<sup>‡</sup>, D. Jayaseelan<sup>‡</sup> and P. Bijji\*

Nanosensor Laboratory, PSG Institute of Advanced Studies, Coimbatore -641004, INDIA.

\*E-mail: [bijju123@yahoo.co.in](mailto:bijju123@yahoo.co.in)

<sup>‡</sup> These authors contributed equally to the work featured in the manuscript.

**Table S1.** Summary of previous works on conductive silver ink

| Method                 | Material                                                                      | Ink chemistry             | Curing                                                                      | $\rho$ ( $\mu\Omega\cdot\text{cm}$ ) | References   |
|------------------------|-------------------------------------------------------------------------------|---------------------------|-----------------------------------------------------------------------------|--------------------------------------|--------------|
| Direct writing method  | Ag NWs                                                                        | Methanol, Silver acetate  | >170 °C.<br>(dried with hot air gun)                                        | 6.75                                 | Present work |
| Inkjet Printing        | Ag NWs                                                                        | isopropyl alcohol         | 110 °C                                                                      | 1000                                 | 1            |
| Screen printing        | Ag NWs                                                                        | Ethanol                   | Compaction                                                                  | 16.47                                | 2            |
| Direct writing method  | Ag                                                                            | -                         | 200 °C                                                                      | 326                                  | 3            |
| Inkjet Printing        | Ag NPs                                                                        | Water/<br>ethylene glycol | >200 °C                                                                     | 10                                   | 4            |
| Brush-painting         | Ag NW / ITO                                                                   | -                         | ITO:100°C / Ag: 150 °C                                                      | 1090                                 | 5            |
| Inkjet Printing        | Custom Ag NP ink<br>(dodecylamine stabilizer)                                 | Methanol                  | 40 to 60 °C                                                                 | 2300                                 | 6            |
| Inkjet Printing        | Ag                                                                            | Ethanol                   | 150-300 °C                                                                  | 21-25                                | 7            |
| Inkjet Printing        | Reactive ink: Diammine silver (I) cations, acetate anions and formate anions. | 2,3-butanediol            | 90 °C.                                                                      | 1.6                                  | 8            |
| Screen printing        | Reactive ink:<br>Ag <sub>2</sub> O + silver 2,2 dimethyl octanoate            | -                         | 180 °C<br>(combination with NaCl sintering)                                 | 27                                   | 9            |
| Inkjet Printing        | Silver nitrate–silver nanowire inks                                           | -                         | 200 °C with ethylene glycol                                                 | 73                                   | 10           |
| Inkjet Printing        | Ag                                                                            | AgNO <sub>3</sub> /Water  | Plasma                                                                      | 1.7                                  | 11           |
| Screen printing        | Custom Ag NP ink<br>(PVP stabilizer), screen printing                         | NaCl                      | Immersing into NaCl solution in combination with ultrasound for 5 to 70 min | 9.91                                 | 12           |
| Vacuum transfer method | Ag NWs<br>(length >500 $\mu\text{m}$ )                                        | Ethanol                   | 250 °C                                                                      | 3.08                                 | 13           |

(\* NPs-Nano particles, NWs-Nanowires)

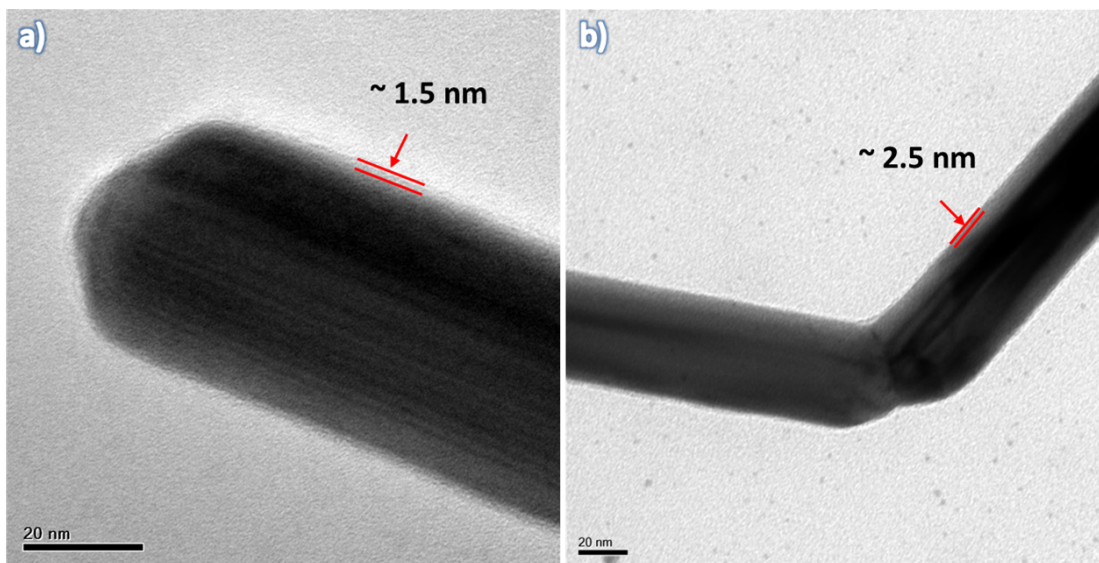

**Figure S1.** (a-b) TEM images of PVP encapsulated ultra-long Ag nanowires

At the end of synthesis, methanol was added to the PVP capped reduced silver nanowires to induce rapid coagulation. Later, the solution was subjected to centrifugation for removing the excess PVP and EG present in the colloidal solution. TEM images were acquired after several washing of precipitates in methanol. A very few nanometre thick (ranges from 1 to 3 nm) amorphous regions was observed around the Ag NWs as depicted in Fig. S1. This thin amorphous layer confirms the presence of residual PVP molecules.

## References

- 1 D. J. Finn, M. Lotya and J. N. Coleman, *ACS Appl. Mater. Interfaces*, 2015, **7**, 9254-9261.
- 2 G.-W. Huang, H.-M. Xiao and S.-Y. Fu, *Nanoscale*, 2014, **6**, 8495-8502.
- 3 W. D. Yang, C.Y. Liu, Z. Y. Zhang, Y. Liu and S. D. Nie, *J. Mater. Chem.*, **22**, 23012-23016.
- 4 M. Vaseem, K. M. Lee, A. R. Hong and Y. B. Hahn, *ACS Appl. Mater. Interfaces*, 2012, **4**, 3300-3307.
- 5 J.A. Jeong and H.K. Kim, *Appl. Phys. Lett.*, 2014, **104**, 071906.
- 6 D. Wakuda, K.-S. Kim and K. Suganuma, *IEEE Trans. Compon. Packag. Technol.*, 2009, **32**, 627-632.
- 7 A. Rivadeneyra, J. Fernandez-Salmeron, M. Agudo, J. A. Lopez-Villanueva, L. F. N. Capitan-Vallvey and A. J. Palma, *Sens. Actuators, B*, 2014, **195**, 123-131.
- 8 S. B. Walker and J. A. Lewis, *JACS*, 2012, **134**, 1419-1421.
- 9 D.-Y. Shin, J. W. Han and S. Chun, *Nanoscale*, 2014, **6**, 630-637
- 10 J. T. Wu, S. L. C. Hsu, M. H. Tsai, Y. F. Liu and W. S. Hwang, *J. Mater. Chem.* 2012, **22**, 15599-15605.
- 11 V. Bromberg, S. Ma, F. D. Egitto and T. J. Singler, *J. Mater. Chem. C*, 2013, **1**, 6842-6849.
- 12 Y. Tang, W. He, G. Zhou, S. Wang, X. Yang, Z. Tao and J. Zhou, *Nanotechnology*, 2012, **23**, 355304.
- 13 J. Lee, P. Lee, H. Lee, D. Lee, S. S. Lee and S. H. Ko, *Nanoscale*, 2012, **4**, 6408-6414.
